# Supplementary material for: Real-time electrochemical detection of pathogen DNA using electrostatic interaction of a redox probe
Source: Royal Society of Chemistry journal article supplement (doi:10.1039/c2an36153a), 2012-11-19
Supplement: c2an36153a.pdf [file c2an36153a.pdf]

**SUPPORTING INFORMATION (SI)**

**Real-time electrochemical detection of pathogens DNA using electrostatic interaction of a redox probe**

**Minhaz Uddin Ahmed<sup>ab</sup>, Sharifun Nahar<sup>a</sup>, Mohammadali Safavieh<sup>a</sup> and Mohammed Zourob<sup>ac</sup>**

<sup>a</sup> *Institut National de la Recherche Scientifique (INRS)- Énergie Matériaux Télécommunications (EMT), 1650 Boulevard Lionel-Boulet, Varennes, J3X1S2, Quebec, Canada*

<sup>b</sup> *Faculty of Science, University of Brunei Darussalam, Jalan Tungku Link, Gadong, BE 1410, Brunei Darussalam. Tel : +6732463001, Ext :1341. Email : minhaz.ahmed@ubd.edu.bn*

<sup>c</sup> *King Abdulla Institute for Nanotechnology. King Saud University, Riyadh 11451, PO Box 2455, Saudi Arabia*

*Tel: 0096614695, Email : mzourob.c@ksu.edu.sa*

**Corresponding Authors : E-mail addresses :**

*minhaz.ahmed@ubd.edu.bn (M. U. Ahmed)*

*mzourob.c@ksu.edu.sa (M. Zourob)*

### Supplementary Information

S1.

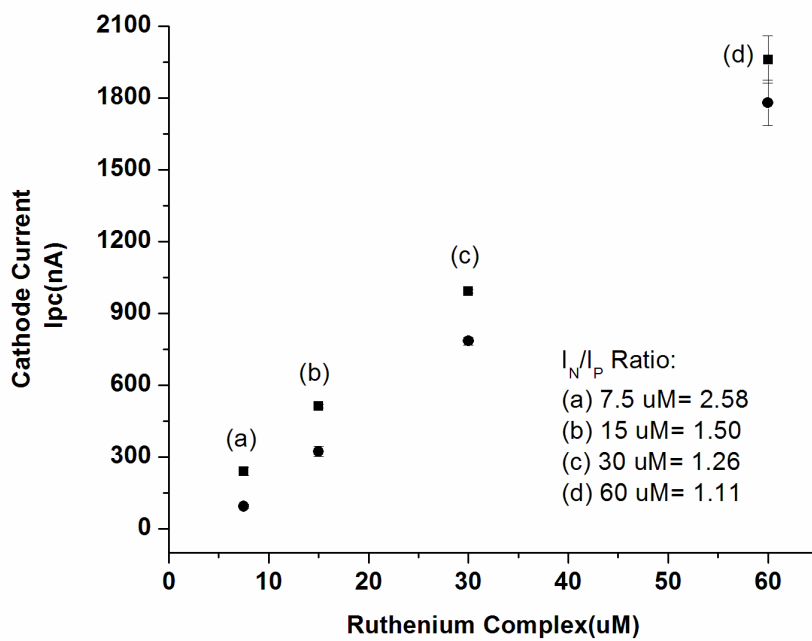

S1: Optimization of the RuHex concentration (7.5-60  $\mu\text{M}$ ) in the presence (P) and absence (N) of dsDNA in 10 mM tris buffer (pH 7.4) using type A electrode. Nevertheless, the 7.5-30  $\mu\text{M}$  RuHex was convenient and reasonable, but we have chosen 15  $\mu\text{M}$  for its appropriate and sufficient signal acquisition without any inhibition of isothermal amplification over time. Error bars indicate the standard deviation of at least three replicated measurements.

### Supplementary Information

S2.

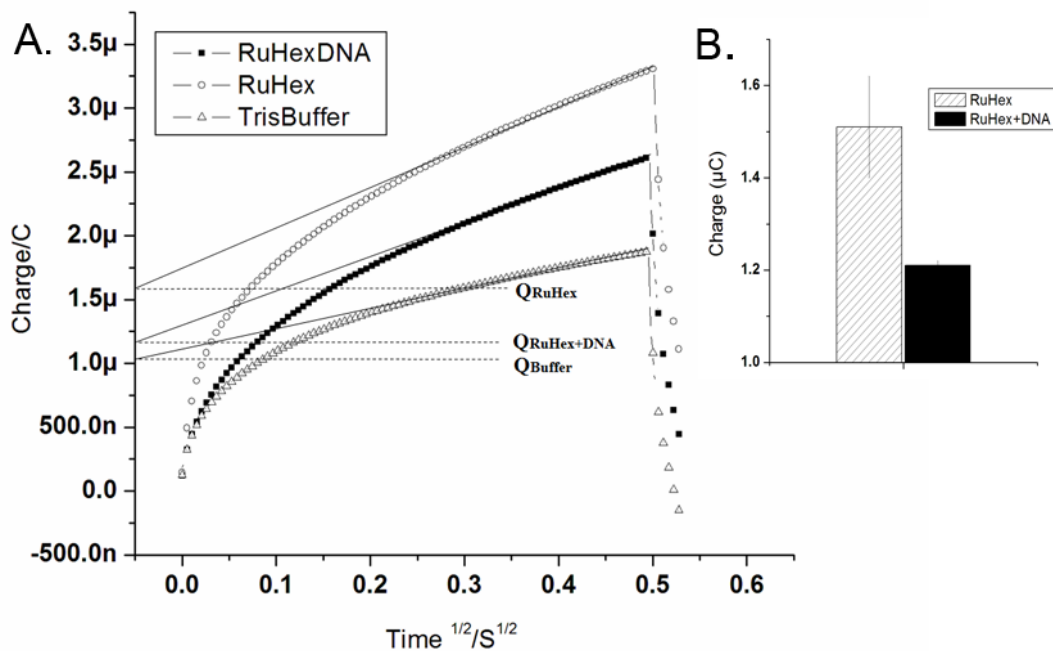

S2: A. Chronocoulometry response curves to observe the signal intensity with RuHex ( $Q_{\text{RuHex}}$ ) and RuHex-dsDNA (10 ng/ $\mu\text{L}$ ) complex ( $Q_{\text{RuHex+DNA}}$ ) in solution using 15  $\mu\text{M}$  of RuHex in Tris-buffer. The dotted lines represent the fit to the data used to determine the intercept at  $t=0$ . B. Signal of the electrode in

presence and absence of DNA. The measurement conditions were same as with A. Error bars show the standard deviations of measurements taken from at least three independent experiments.

### Supplementary Information

S3.

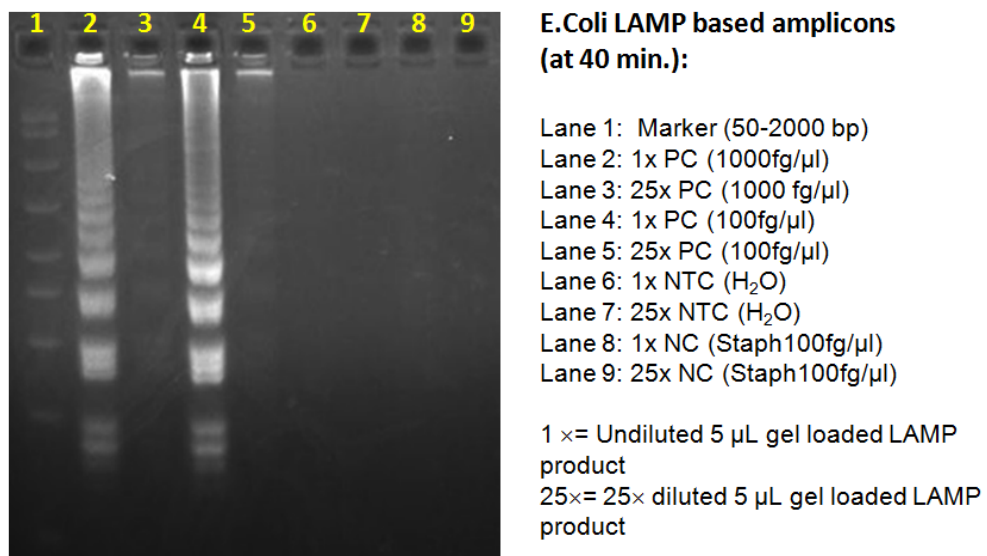

S3: An example of *E. Coli* LAMP based amplicons as observed with 1x and 25x dilution on agarose gel (lane 2-9). Although, 5  $\mu$ L loaded sample with 25x dilution (lane 3 and 5) shows faint band, but our SWV

based observation shows clear current differences (see fig 4B) at 40 min. to distinguish the same diluted products. The high sensitive end point amplicon detection shows promising impact on our real-time electrochemical sensing with RuHex in the shortest possible time. Staph 100 fg/ $\mu$ L of gDNA was used to show cross reactivity. Agarose gel electrophoresis (2%) was performed with 1 $\times$ TBE buffer.

### Supplementary Information

S4

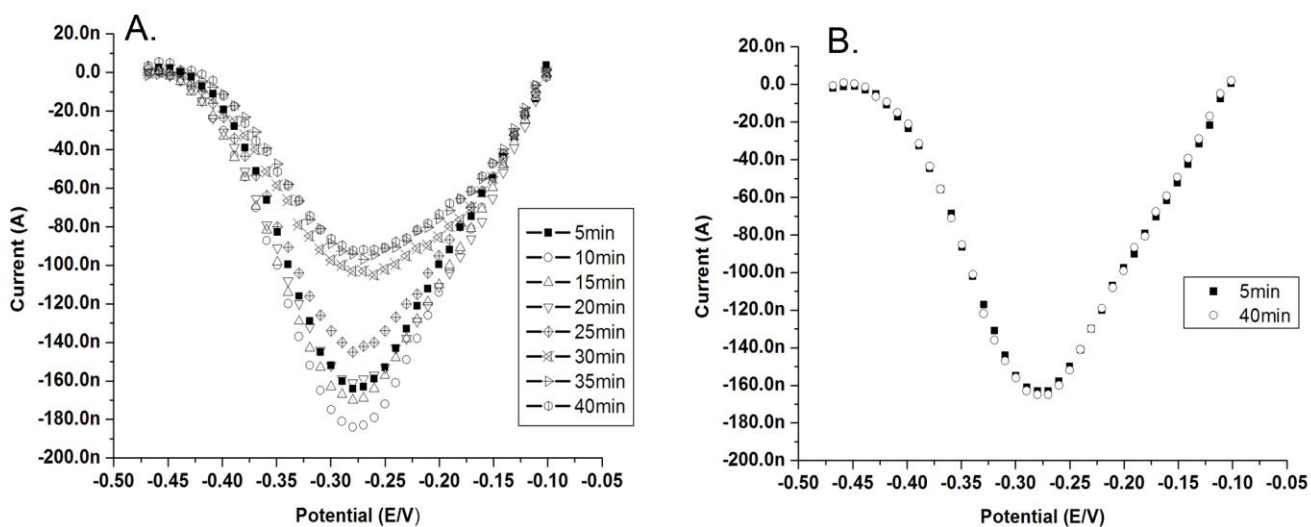

S4: Series of electrochemical SWV cathode peaks (baseline corrected) recorded during the LAMP amplification of (A) 10 pg/ $\mu$ L of *S. Aureus* template gDNA from 5-40 min, and (B) NTC (H<sub>2</sub>O), 5 and 40

min. The experiments were performed in 50  $\mu\text{L}$  of LAMP solution at 66° C containing 15  $\mu\text{M}$  of RuHex. The SWV curves on figure A were achieved on each 5 min. interval. The electrode type B was used for all real-time measurements, and one electrode was used for multiple scans up to 40 min.

### **Supplementary Information**

S5

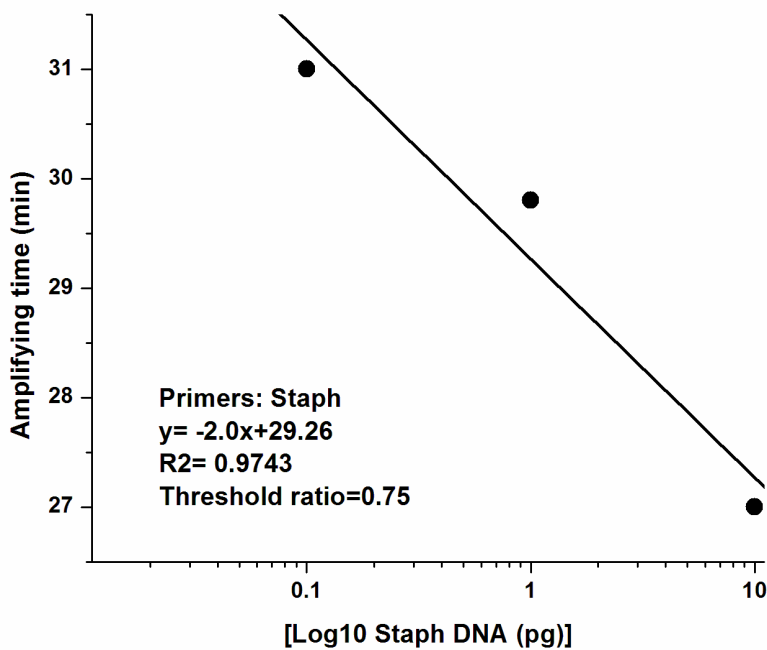

S5: The threshold ratio 0.75 is taken while *S. Aureus* specific loop primers were used for 10 pg/ $\mu$ L, 1 pg/ $\mu$ L and 100 fg/ $\mu$ L of template gDNA and that crossed the threshold ratio at 26.2, 30.0 and 31.25 min, respectively. Threshold reaction times are plotted against the  $\log_{10}$  of added *S. Aureus* gDNA. Standard curve is calculated and the linear regression line; the equation and  $R^2$  are all shown.

### Supplementary Information

S6

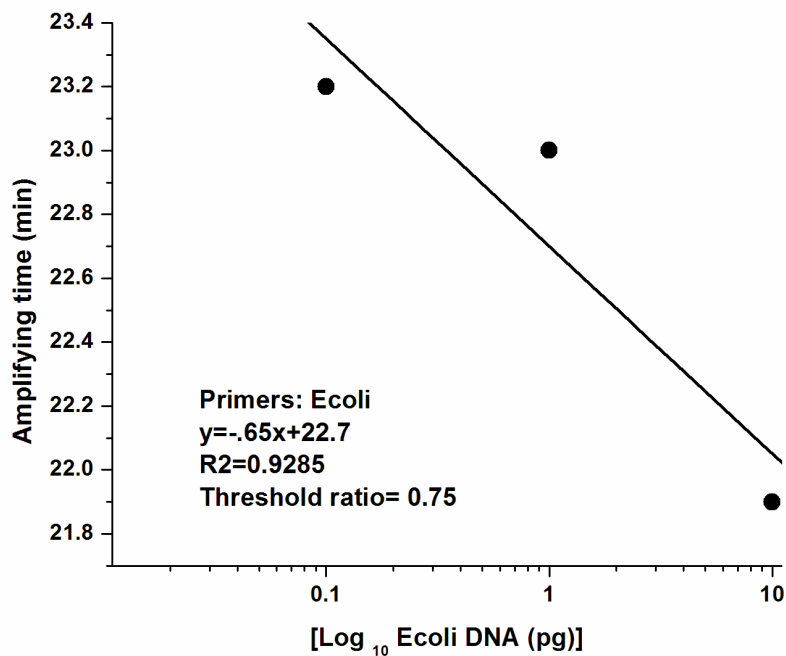

S6: The threshold ratio 0.75 is taken while *E. Coli* specific loop primers were used for 10 pg/ $\mu$ L, 1 pg/ $\mu$ L and 100 fg/ $\mu$ L of template gDNA and that crossed the threshold ratio at 22.3, 23.3 and 24.0 min, respectively. Threshold reaction times are plotted against the log<sub>10</sub> of added *S. Aureus* gDNA. Standard curve is calculated and the linear regression line; the equation and R<sup>2</sup> are all shown.

**Table S-7 : Isothermal electrochemical sensing of DNA/RNA in recent years using different redox molecules**



| <b>Samples, sizes</b>                              | <b>Target<br/>gDNA/Plasmid/<math>\mu</math>L</b> | <b>Copies/<math>\mu</math>L</b> | <b>Detection<br/>time<br/>(Min)</b> | <b>Redox Type,<br/>Amplification<br/>Protocol,<br/>Voltammetry</b> |
|----------------------------------------------------|--------------------------------------------------|---------------------------------|-------------------------------------|--------------------------------------------------------------------|
| <i>S. Aureus</i> gDNA<br>2.9 Mb<br>(Current Study) | 10 pg                                            | $3.1 \times 10^3$               | 26                                  | Ruthenium<br>Hexamine,<br>LAMP, SWV                                |
|                                                    | 1 pg                                             | $3.2 \times 10^2$               | 28                                  |                                                                    |
|                                                    | 100 fg                                           | $3.1 \times 10$                 | 29                                  |                                                                    |
| <i>E. Coli</i> gDNA<br>4.6 Mb<br>(Current Study)   | 10 pg                                            | $2 \times 10^3$                 | 21                                  | Ruthenium<br>Hexamine,<br>LAMP, SWV                                |
|                                                    | 1pg                                              | $2 \times 10^2$                 | 22                                  |                                                                    |
|                                                    | 100 fg                                           | $2 \times 10$                   | 22.5                                |                                                                    |
| <i>E. Coli</i> Plasmid<br>89 bp <sup>1</sup>       | -                                                | $5 \times 10^9$                 | 15                                  | Os[(bpy) <sub>2</sub> DPPZ,<br>HDA,SWV                             |
|                                                    | -                                                | $5 \times 10^6$                 | 37                                  |                                                                    |
|                                                    | -                                                | $5 \times 10^3$                 | 48                                  |                                                                    |
| H1N1 Virus,<br>13000 bases <sup>2</sup>            | 6.36 ng                                          | $6.79 \times 10^9$              | 17.5                                | Methylene Blue,<br>LAMP, SWV                                       |
|                                                    | 636 pg                                           | $6.79 \times 10^8$              | 20.2                                |                                                                    |
|                                                    | 63.6 pg                                          | $6.79 \times 10^7$              | 22.4                                |                                                                    |

Table S-8: Detection of salmon dsDNA (data from figure 3) at room temperature

|           |            |
|-----------|------------|
| DNA Conc. | RSD (%) of |
|-----------|------------|

| ng/ $\mu$ L | cathode current value (measured at room temperature), n=3 |
|-------------|-----------------------------------------------------------|
| 0           | 3.71                                                      |
| 1           | 5.01                                                      |
| 2.5         | 5.19                                                      |
| 5           | 2.03                                                      |
| 7.5         | 5.29                                                      |
| 10          | 3.57                                                      |

**Table S-9:** Detection of loop amplicon at 65<sup>0</sup> C (for *E. Coli*, data of figure 6 A, 100 fg *E.Coli* DNA was used as target) .

| Time of Analysis | RSD (%) of cathode current value (measured at |
|------------------|-----------------------------------------------|
|------------------|-----------------------------------------------|

| (min.) | 65° C), n=3 |
|--------|-------------|
| 5      | 3.8         |
| 10     | 1.14        |
| 15     | 4.52        |
| 20     | 1.63        |
| 25     | 5.90        |
| 30     | 2.54        |
| 35     | 6.84        |
| 40     | 4.44        |

References of SI:

1. Nagatani, N.; Yamanaka, K.; Saito, M.; Koketsu, R.; Sasaki, T.; Ikuta, K.; Miyahara, T.; Tamiya, E., *Analyst*. 2011, 21, 5143-5150.
2. Kivlehan, F.; Mavre, F.; Talini, L.; Limoges, B.; Marchal, D., *Analyst*, 2011, 3635-3642.
